# Supplementary material for: Redefining the Australian Anthrax Belt: Modeling the Ecological Niche and Predicting the Geographic Distribution of Bacillus anthracis
Source: PubMed Central journal article supplement (PMC4900651; doi:10.1371/journal.pntd.0004689), 2016-06-09
Supplement: pntd.0004689.s004.pdf [file pntd.0004689.s004.pdf]

Table S1. Summary accuracy statistics for 10 GARP modeling experiments. Experiments are ranked by AUC score and total omission values.

| <b>GARP experiments</b> | <b>AUC</b> | <b>SE</b> | <b>Z</b> | <b>Total Omission</b> | <b>Average Omission</b> | <b>Total Commission</b> | <b>Average Commission</b> |
|-------------------------|------------|-----------|----------|-----------------------|-------------------------|-------------------------|---------------------------|
| Random 5                | 0.966      | 0.026     | 11.374   | 0.000                 | 0.833                   | 6.241                   | 12.150                    |
| Random 9                | 0.962      | 0.027     | 11.227   | 0.000                 | 3.333                   | 5.966                   | 12.503                    |
| Random 7                | 0.962      | 0.027     | 11.008   | 0.000                 | 3.333                   | 6.687                   | 12.433                    |
| Random 10               | 0.961      | 0.028     | 11.667   | 0.000                 | 1.667                   | 6.883                   | 11.965                    |
| Random 2                | 0.960      | 0.028     | 11.592   | 0.000                 | 0.417                   | 7.614                   | 12.846                    |
| Random 8                | 0.960      | 0.028     | 11.794   | 0.000                 | 0.417                   | 7.598                   | 12.690                    |
| Random 4                | 0.956      | 0.029     | 11.126   | 0.000                 | 0.833                   | 8.047                   | 13.808                    |
| Random 3                | 0.956      | 0.029     | 11.514   | 0.000                 | 2.500                   | 7.811                   | 12.836                    |
| Random 1                | 0.955      | 0.030     | 12.027   | 0.000                 | 5.000                   | 7.629                   | 11.936                    |
| Random 6                | 0.918      | 0.039     | 11.848   | 8.333                 | 5.278                   | 6.770                   | 11.784                    |
