# Supplementary material for: Redefining the Australian Anthrax Belt: Modeling the Ecological Niche and Predicting the Geographic Distribution of Bacillus anthracis
Source: PLoS Negl Trop Dis. 2016 Jun 9;10(6):e0004689. doi: 10.1371/journal.pntd.0004689 (PMC4900651; doi:10.1371/journal.pntd.0004689)
Supplement: S2 Table — (PDF) [file pntd.0004689.s005.pdf]

Table S2. Number and percentages (%) of rule types from the 10 best subset models of GARP experiment 5.

[illegible]
